# Supplementary material for: Spatially-Resolved Eigenmode Decomposition of Red Blood Cells Membrane Fluctuations Questions the Role of ATP in Flickering
Source: PubMed Central journal article supplement (PMC3416845; doi:10.1371/journal.pone.0040667), 2012-08-10
Supplement: pone.0040667.s002.pdf [file pone.0040667.s002.pdf]

---

| Mode number                      | 1   | 2   | 3    | 4    | 5    | 6    | 7    | 8    | 9     |
|----------------------------------|-----|-----|------|------|------|------|------|------|-------|
| Laplace $\widetilde{\epsilon}_m$ | 145 | 430 | 1075 | 1507 | 1576 | 2401 | 3347 | 4899 | 10907 |
| BCH $\widetilde{\epsilon}_m$     | 151 | 338 | 900  | 928  | 882  | 2176 | 2378 | 4691 | 7464  |
| SC $\widetilde{\epsilon}_m$      | 164 | 225 | 451  | 347  | -30  | 1024 | 1047 | 2243 | 3088  |

---
